# Supplementary material for: Ant Mortality with Food Competition in Forests along a Temperature Gradient
Source: MDPI journal article supplement (doi:10.3390/insects13040392), 2022-04-15
Supplement: s1 [file s1]

## Supplementary Material

### Ant mortality with food competition in forests along a temperature gradient

Tae-Sung Kwon<sup>1</sup>, Dae-Seong Lee<sup>2</sup>, Young-Seuk Park<sup>2\*</sup>

<sup>1</sup>Alpha Insect Diversity Lab, Nowon, Seoul 01746, Republic of Korea

<sup>2</sup>Department of Biology, Kyung Hee University, Dongdaemun, Seoul 02447, Republic of Korea

\* **Correspondence:** parkys@khu.ac.kr

Table S1. Data used in the study

| Site | at   | mat   | do | ds | d  | ab   | pdo | pds | pd | p    | ndo | nds | nd | n   | ado | ads | ad | a    |
|------|------|-------|----|----|----|------|-----|-----|----|------|-----|-----|----|-----|-----|-----|----|------|
| UD   | 19.5 | 7.35  | 0  | 0  | 0  | 222  | 0   | 0   | 0  | 11   | 0   | 0   | 0  | 0   | 0   | 0   | 0  | 0    |
| UD   | 23.6 | 7.35  | 0  | 0  | 0  | 337  | 0   | 0   | 0  | 50   | 0   | 0   | 0  | 36  | 0   | 0   | 0  | 0    |
| UD   | 23.2 | 7.35  | 0  | 0  | 0  | 257  | 0   | 0   | 0  | 45   | 0   | 0   | 0  | 0   | 0   | 0   | 0  | 0    |
| UD   | 21.8 | 7.35  | 1  | 0  | 1  | 227  | 0   | 0   | 0  | 51   | 0   | 0   | 0  | 0   | 0   | 0   | 0  | 0    |
| UD   | 19   | 7.35  | 0  | 0  | 0  | 310  | 0   | 0   | 0  | 3    | 0   | 0   | 0  | 0   | 0   | 0   | 0  | 0    |
| UD   | 20.3 | 7.35  | 0  | 0  | 0  | 70   | 0   | 0   | 0  | 48   | 0   | 0   | 0  | 0   | 0   | 0   | 0  | 5    |
| UD   | 18.3 | 7.35  | 0  | 0  | 0  | 49   | 0   | 0   | 0  | 14   | 0   | 0   | 0  | 0   | 0   | 0   | 0  | 3    |
| UD   | 18.5 | 7.35  | 0  | 0  | 0  | 23   | 0   | 0   | 0  | 7    | 0   | 0   | 0  | 0   | 0   | 0   | 0  | 1    |
| HA   | 20   | 8.64  | 0  | 0  | 0  | 511  | 0   | 0   | 0  | 0    | 0   | 0   | 0  | 25  | 0   | 0   | 0  | 131  |
| HA   | 20.3 | 8.64  | 3  | 2  | 5  | 1392 | 2   | 0   | 2  | 78   | 0   | 0   | 0  | 298 | 0   | 0   | 0  | 71   |
| HA   | 20.8 | 8.64  | 13 | 3  | 16 | 1096 | 0   | 0   | 0  | 1    | 4   | 0   | 4  | 391 | 2   | 2   | 4  | 292  |
| HA   | 19.8 | 8.64  | 5  | 1  | 6  | 1169 | 0   | 0   | 0  | 0    | 3   | 0   | 3  | 231 | 1   | 1   | 2  | 540  |
| HA   | 17.5 | 8.64  | 2  | 0  | 2  | 206  | 0   | 0   | 0  | 0    | 0   | 0   | 0  | 31  | 1   | 0   | 1  | 84   |
| HA   | 18.9 | 8.64  | 0  | 0  | 0  | 236  | 0   | 0   | 0  | 0    | 0   | 0   | 0  | 54  | 0   | 0   | 0  | 97   |
| HA   | 18   | 8.64  | 1  | 0  | 1  | 317  | 0   | 0   | 0  | 5    | 0   | 0   | 0  | 3   | 0   | 0   | 0  | 140  |
| HA   | 17.8 | 8.64  | 1  | 0  | 1  | 630  | 0   | 0   | 0  | 0    | 0   | 0   | 0  | 41  | 0   | 0   | 0  | 337  |
| GN   | 24   | 10.32 | 1  | 1  | 2  | 854  | 0   | 0   | 0  | 135  | 1   | 0   | 1  | 96  | 0   | 1   | 1  | 411  |
| GN   | 23   | 10.32 | 4  | 0  | 4  | 1890 | 4   | 0   | 4  | 1079 | 0   | 0   | 0  | 245 | 0   | 0   | 0  | 541  |
| GN   | 25   | 10.32 | 17 | 0  | 17 | 3152 | 16  | 0   | 16 | 2284 | 1   | 0   | 1  | 396 | 0   | 0   | 0  | 456  |
| GN   | 27.5 | 10.32 | 13 | 0  | 13 | 3158 | 10  | 0   | 10 | 2194 | 2   | 0   | 2  | 289 | 1   | 0   | 1  | 629  |
| GN   | 19   | 10.32 | 0  | 0  | 0  | 4221 | 0   | 0   | 0  | 1137 | 0   | 0   | 0  | 91  | 0   | 0   | 0  | 1655 |
| GN   | 25   | 10.32 | 8  | 0  | 8  | 3507 | 5   | 0   | 5  | 2165 | 3   | 0   | 3  | 410 | 0   | 0   | 0  | 889  |
| GN   | 21.5 | 10.32 | 6  | 0  | 6  | 5541 | 2   | 0   | 2  | 4172 | 3   | 0   | 3  | 746 | 1   | 0   | 1  | 609  |
| GN   | 23   | 10.32 | 4  | 2  | 6  | 2726 | 4   | 0   | 4  | 2035 | 0   | 0   | 0  | 382 | 0   | 2   | 2  | 240  |

Supplementary Material

|    |       |       |    |   |    |      |   |   |   |      |   |   |   |      |   |   |   |      |
|----|-------|-------|----|---|----|------|---|---|---|------|---|---|---|------|---|---|---|------|
| SB | 24.5  | 10.66 | 1  | 0 | 1  | 1831 | 0 | 0 | 0 | 584  | 1 | 0 | 1 | 875  | 0 | 0 | 0 | 279  |
| SB | 24.6  | 10.66 | 1  | 0 | 1  | 3151 | 0 | 0 | 0 | 1024 | 1 | 0 | 1 | 914  | 0 | 0 | 0 | 969  |
| SB | 27    | 10.66 | 14 | 1 | 15 | 5125 | 4 | 1 | 5 | 2489 | 9 | 0 | 9 | 1358 | 0 | 0 | 0 | 1089 |
| SB | 24.3  | 10.66 | 10 | 0 | 10 | 4490 | 4 | 0 | 4 | 1327 | 5 | 0 | 5 | 1149 | 1 | 0 | 1 | 1605 |
| SB | 17.5  | 10.66 | 2  | 0 | 2  | 5424 | 1 | 0 | 1 | 2502 | 1 | 0 | 1 | 218  | 0 | 0 | 0 | 2612 |
| SB | 25.5  | 10.66 | 0  | 0 | 0  | 2668 | 0 | 0 | 0 | 919  | 0 | 0 | 0 | 790  | 0 | 0 | 0 | 900  |
| SB | 21.3  | 10.66 | 0  | 0 | 0  | 3054 | 0 | 0 | 0 | 1163 | 0 | 0 | 0 | 922  | 0 | 0 | 0 | 814  |
| SB | 19.6  | 10.66 | 5  | 0 | 5  | 3660 | 3 | 0 | 3 | 2069 | 2 | 0 | 2 | 701  | 0 | 0 | 0 | 885  |
| GA | 25    | 11.12 | 3  | 3 | 6  | 2167 | 0 | 0 | 0 | 657  | 3 | 0 | 3 | 981  | 0 | 3 | 3 | 447  |
| GA | 24.96 | 11.12 | 2  | 2 | 4  | 3590 | 0 | 0 | 0 | 1256 | 2 | 1 | 3 | 1660 | 0 | 1 | 1 | 651  |
| GA | 26.9  | 11.12 | 6  | 2 | 8  | 4065 | 1 | 0 | 1 | 2040 | 5 | 0 | 5 | 1259 | 0 | 2 | 2 | 644  |
| GA | 23.3  | 11.12 | 1  | 2 | 3  | 3287 | 1 | 2 | 3 | 976  | 0 | 0 | 0 | 1199 | 0 | 0 | 0 | 1045 |
| GA | 18    | 11.12 | 1  | 0 | 1  | 3102 | 0 | 0 | 0 | 1183 | 1 | 0 | 1 | 393  | 0 | 0 | 0 | 1193 |
| GA | 27    | 11.12 | 1  | 0 | 1  | 3260 | 1 | 0 | 1 | 1087 | 0 | 0 | 0 | 1486 | 0 | 0 | 0 | 498  |
| GA | 21.8  | 11.12 | 7  | 0 | 7  | 4370 | 0 | 0 | 0 | 569  | 7 | 0 | 7 | 2751 | 0 | 0 | 0 | 1049 |
| GA | 19    | 11.12 | 1  | 0 | 1  | 4590 | 0 | 0 | 0 | 666  | 1 | 0 | 1 | 3158 | 0 | 0 | 0 | 766  |
| GS | 23.5  | 11.98 | 0  | 1 | 1  | 3321 | 0 | 0 | 0 | 0    | 0 | 1 | 1 | 3303 | 0 | 0 | 0 | 2    |
| GS | 28.3  | 11.98 | 3  | 1 | 4  | 4798 | 0 | 0 | 0 | 477  | 3 | 1 | 4 | 4093 | 0 | 0 | 0 | 0    |
| GS | 30.5  | 11.98 | 0  | 2 | 2  | 4399 | 0 | 0 | 0 | 180  | 0 | 2 | 2 | 3809 | 0 | 0 | 0 | 0    |
| GS | 25    | 11.98 | 0  | 1 | 1  | 6106 | 0 | 0 | 0 | 212  | 0 | 1 | 1 | 5838 | 0 | 0 | 0 | 0    |
| GS | 20    | 11.98 | 0  | 0 | 0  | 2213 | 0 | 0 | 0 | 76   | 0 | 0 | 0 | 2106 | 0 | 0 | 0 | 0    |
| GS | 28.8  | 11.98 | 1  | 1 | 2  | 5806 | 0 | 0 | 0 | 0    | 1 | 1 | 2 | 5706 | 0 | 0 | 0 | 0    |
| GS | 22    | 11.98 | 0  | 5 | 5  | 7496 | 0 | 0 | 0 | 1    | 0 | 5 | 5 | 7487 | 0 | 0 | 0 | 0    |
| GS | 19.1  | 11.98 | 0  | 5 | 5  | 9951 | 0 | 0 | 0 | 0    | 0 | 5 | 5 | 9947 | 0 | 0 | 0 | 0    |

| Variable | Content                                                         |
|----------|-----------------------------------------------------------------|
| Site     | Sites                                                           |
| at       | atmosphere temperature                                          |
| mat      | mean annual temperature                                         |
| do       | number of ants killed by other species                          |
| ds       | number of ants killed by same species                           |
| d        | number of ants killed                                           |
| ab       | number of ants gathered at baits                                |
| pdo      | number of <i>Pheidole fervida</i> killed by other species       |
| pds      | number of <i>Pheidole fervida</i> killed by same species        |
| pd       | number of <i>Pheidole fervida</i> killed                        |
| p        | number of <i>Pheidole fervida</i> gathered at baits             |
| ndo      | number of <i>Nylanderia flavipes</i> killed by other species    |
| nds      | number of <i>Nylanderia flavipes</i> killed by same species     |
| nd       | number of <i>Nylanderia flavipes</i> killed                     |
| n        | number of <i>Nylanderia flavipes</i> gathered at baits          |
| ado      | number of <i>Aphaenogaster japonica</i> killed by other species |
| ads      | number of <i>Aphaenogaster japonica</i> killed by same species  |
| ad       | number of <i>Aphaenogaster japonica</i> killed                  |
| a        | number of <i>Aphaenogaster japonica</i> gathered at baits       |
